# Supplementary material
Source: PubMed Central journal article supplement (PMC1821088)

Figure S1

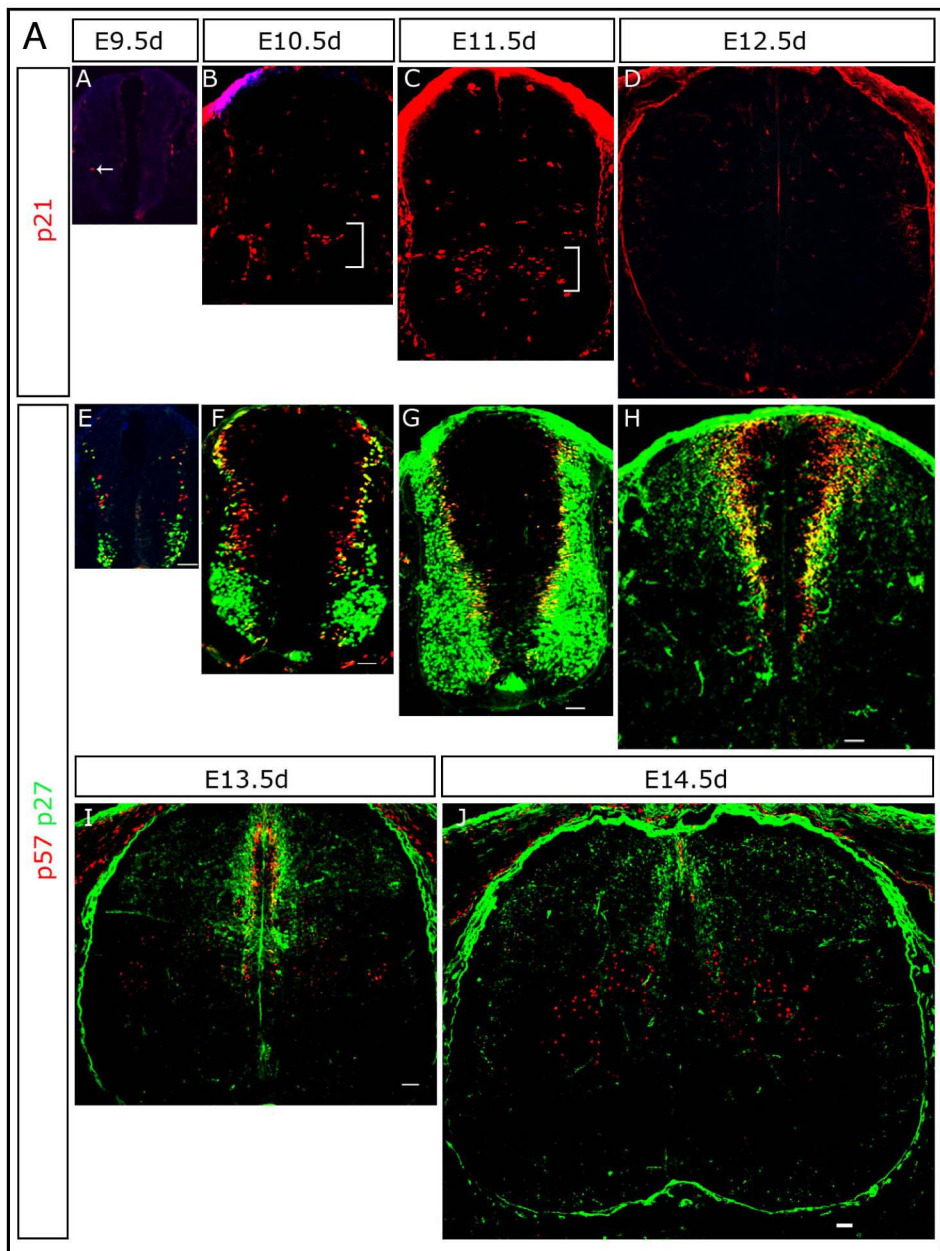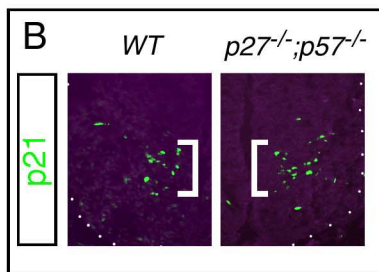

Supplement: NIHMS16059-supplement-01.pdf [file NIHMS16059-supplement-01.pdf]

Figure S2

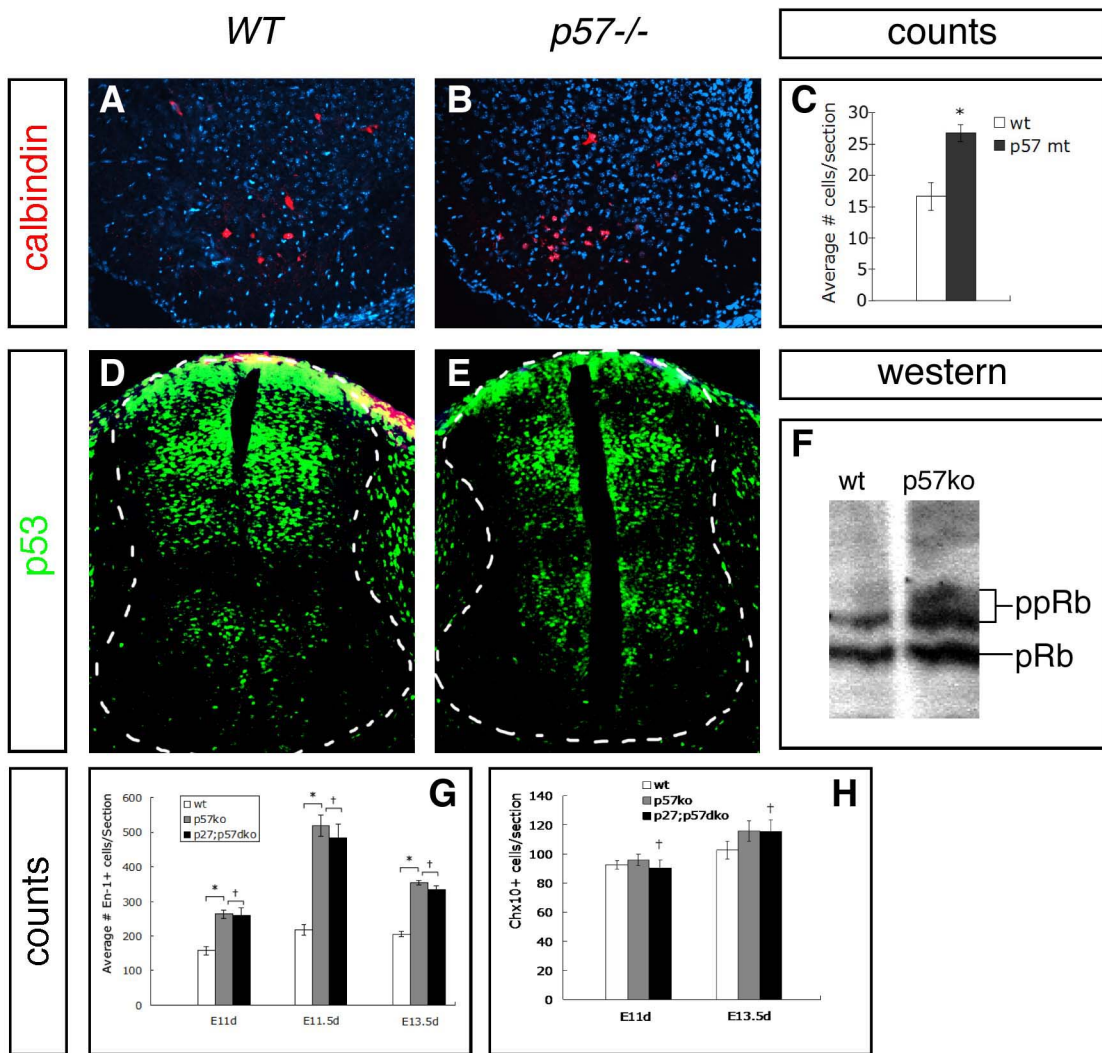

Supplement: NIHMS16059-supplement-02.pdf [file NIHMS16059-supplement-02.pdf]
